# Supplementary material for: In silico prediction of the in vitro behavior of polymeric gene delivery vectors
Source: Royal Society of Chemistry journal article supplement (doi:10.1039/d0nr09052b), 2021-01-01

## Electronic Supplementary Information (ESI)

### ***In silico* prediction of the *in vitro* behavior of polymeric gene delivery vectors**

Nina Bono <sup>a</sup>, Bárbara Coloma <sup>a,b</sup>, Francesca Moreschi <sup>a,b</sup>, Alberto Redaelli <sup>b</sup>, Alfonso Gautieri <sup>b,\*</sup> and Gabriele Candiani <sup>a,\*</sup>

<sup>a</sup>GenT L&B, Dept. Chemistry, Materials and Chemical Engineering "G. Natta", Politecnico di Milano, 20131 Milan (Italy).

<sup>b</sup>Biomolecular Engineering Lab, Dept. Electronics, Information and Bioengineering, Politecnico di Milano, 20131 Milan (Italy).

#### **\*Corresponding Authors:**

Alfonso Gautieri

Biomolecular Engineering Lab, Dept. Electronics, Information and Bioengineering, Politecnico di Milano, 20131 Milan (Italy).

tel: +39.02.2399.3515

E-mail: [alfonso.gautieri@polimi.it](mailto:alfonso.gautieri@polimi.it)

Gabriele Candiani

GenT L&B, Dept. Chemistry, Materials and Chemical Engineering "G. Natta", Politecnico di Milano, 20131 Milan (Italy).

tel: +39.02.2399.3181

e-mail: [gabriele.candiani@polimi.it](mailto:gabriele.candiani@polimi.it)

### Parameters: Bonds, angles and dihedral angles for branched PEIs

Albeit the lack of published parameters, the criteria for replacing unparametrized bonds, angles and dihedral angles always pursued preferring the most similar among all available. In fact, there were only two issues: whether a *missing charge* (a published parameter considering an “S” bead instead of an “Sq”), issue that can be understood when considering such high protonation level of secondary amines according to *in vitro* results (100%), or a *missing bead* (published “s” bead instead of t). The latter situation was infrequent.

**Table S1:** Bond parameters replacements

| BONDS          |                     |
|----------------|---------------------|
| Missing charge |                     |
| Not published  | Replaced with       |
| sq-pq          | s-pq                |
| sq-sq          | sq-s (same as s-sq) |

**Table S2:** Angle parameters replacements

| ANGLES         |               |
|----------------|---------------|
| Missing charge |               |
| Not published  | Replaced with |
| sq-t-sq        | sq-t-s        |
| t-t-sq         | t-t-s         |
| t-sq-pq        | t-s-pq        |
| Nsq-t-t        | Ns-t-t        |
| Np-t-sq        | Np-t-s        |
| t-sq-sq        | t-s-sq        |
| sq-sq-t        | sq-s-t        |

**Table S3:** Dihedral parameters replacements

| DIHEDRALS ANGLES |               |               |               |
|------------------|---------------|---------------|---------------|
| Missing charge   |               | Missing bead  |               |
| Not published    | Replaced with | Not published | Replaced with |
| sq-t-t-p         | s-t-t-p       | sq-t-s-pq     | sq-t-t-pq     |
| Nt-t-sq-pq       | Nt-t-s-pq     | t-t-sq-sq     | t-t-t-s       |
| Nsq-t-t-sq       | Ns-t-t-s      | sq-sq-t-t     | s-t-t-t       |
| t-sq-sq-t        | t-sq-s-t      |               |               |
| Nsq-t-t-p        | Ns-t-t-p      |               |               |
| sq-sq-t-sq       | s-sq-t-s      |               |               |
| sq-t-sq-pq       | s-t-s-pq      |               |               |
| t-t-sq-pq        | t-t-s-pq      |               |               |
| Np-t-sq-pq       | Np-t-s-pq     |               |               |

**Figure S1.** Timeline of siRNA-PEIs transfection assays.

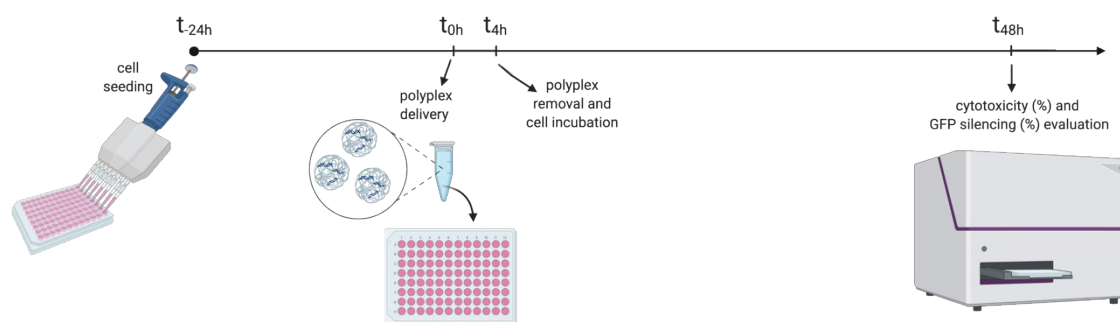

**Figure S2.** Cytotoxicity (%) evaluated on GFP-293 cells of siRNA scramble-PEIs complexes (10 kDa /PEI = white bars; 10 kDa *b*PEI = black bars) prepared at different N/Ps (5, 10, 15, 30). Results are expressed as mean  $\pm$  SD ( $n \geq 3$ ).

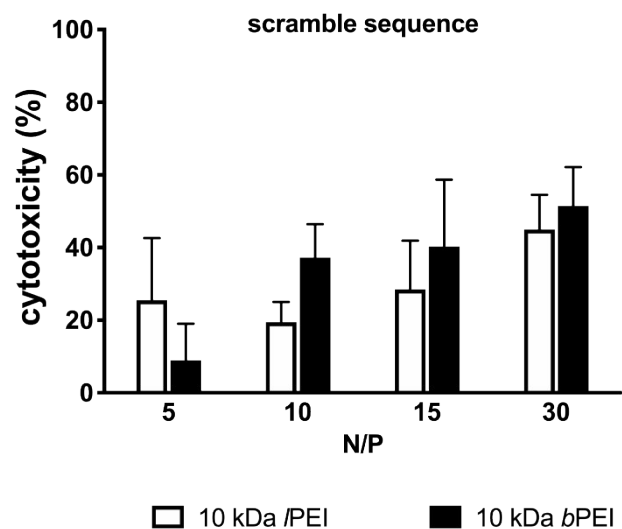

**Figure S3.** Polydispersity index (PDI) of siRNA-PEIs complexes prepared at N/P 10. Data were obtained while measuring the size (expressed in terms of  $D_H$ ) using Dynamic Light Scattering (DLS) technique.

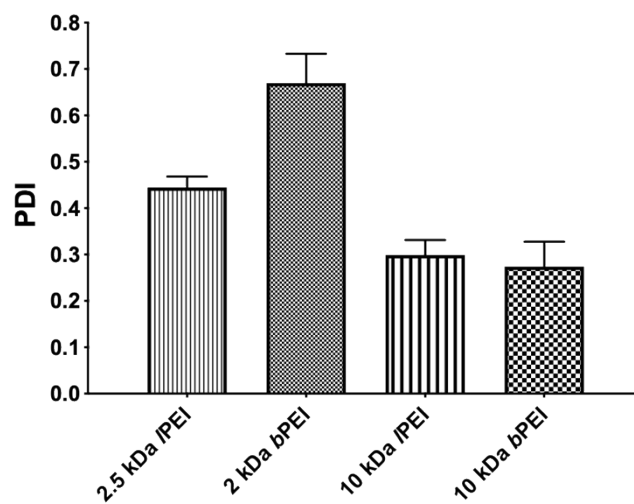

Supplement: d0nr09052b10.pdf [file d0nr09052b10.pdf]
